# Supplementary material for: Practices and Perspectives of College Instructors on Addressing Religious Beliefs When Teaching Evolution
Source: Atypon-hosted journal article supplement (doi:10.1187/cbe.15-11-0243), 2016-05-19
Supplement: combinedsupmats.pdf [file combinedsupmats.pdf]

# **Supplemental Material**

*CBE—Life Sciences Education*

**Barnes and Brownell**

Please indicate the following:

1. What group do you most closely identify with?
  - a. Protestant (non-Catholic Christian)
  - b. Catholic
  - c. Mormon
  - d. Muslim
  - e. Buddhist
  - f. Jewish
  - g. Agnostic
  - h. Atheist
  - i. Other \_\_\_\_\_
  - j.
2. As a child, what group did those who lived in your household most closely identify with?  
If each of your parents identified with a different group, please circle all that apply.
  - a. Protestant (non-Catholic Christian)
  - b. Catholic
  - c. Mormon
  - d. Muslim
  - e. Buddhist
  - f. Jewish
  - g. Agnostic
  - h. Atheist
  - i. Other \_\_\_\_\_
3. Gender
  - a. Male
  - b. Female
  - c. Decline to answer
4. Please indicate your highest degree attained:  

---
5. How many years have you been teaching undergraduates?  

---
6. On a scale of 1-10, 1 being completely inexperienced and 10 being extremely experienced, how much experience do you have teaching evolution to undergraduates?  

---

7. Please check the sentence that most closely aligns with what you believe:
- a. Human beings have evolved over billions of years from older life forms and God guided this process
  - b. Human beings have evolved over billions of years from older life forms and God started this process, but did not intervene after.
  - c. Human beings have evolved over billions of years from older life forms and God was not involved in this process.
  - d. Human beings have evolved over billions of years from older life forms and I do not know whether or not God had anything to do with this process.
  - e. God created human beings, more or less, in their present form.
